# Supplementary material for: A novel one pot synthesis of nitrogen containing heterocycles: an alternate methodology to the Biginelli and Hantzsch reactions
Source: Royal Society of Chemistry journal article supplement (doi:10.1039/b205539m), 2002-01-01
Supplement: b205539m.doc [file b205539m.doc]

**Supplementary Data**

*General procedure for the synthesis of Biginelli tetrahydropyrimidines* **(2a-e)**

**Solution phase (conventional)**

A mixture of 0.037 mol of ethyl acetoacetate, 0.024 mol of aldehyde **(1a-e)**, 0.024 mol of thiourea in 20 ml of ethanol and four drops of conc. HCl was refluxed for specified time (**Table 1**) in a 100 ml round bottom flask. On completion of reaction as monitored by TLC the reaction mixture was allowed to stand for 24 hours at room temperature. The product obtained was filtered, washed with 50% ethanol and recrystallized from methanol.

**Solid support (Microwave)**

A mixture of 0.037 mol of ethyl acetoacetate, 0.024 mol of aldehyde **(1a-e)**, 0.024 mol of thiourea dissolved in ethanol (about 10-15 ml) was taken in a beaker and adsorbed over solid support. The reaction mixture was air dried, kept in alumina bath and irradiated in microwave oven. On completion of reaction as monitored by TLC the product was eluted using ethanol. Recovering the solvent under reduced pressure gave the required product which was recrystallized from methanol.

**Neat synthesis (Microwave)**

A mixture of 0.024 mol of ethyl acetoacetate, 0.024 mol of aldehyde **(1a-e)**, 0.024 mol of thiourea was taken in an Erlenmeyer flask and was subjected to Microwave irradiation (MWI). The progress of the reaction was monitored by TLC at an interval of 30 seconds. On completion of reaction the reaction mixture was titurated with few drops of methanol and the product obtained was recrystallized from aqueous methanol.

*General procedure for the synthesis of Hantzsch dihydropyridines* **(3a-e)**

**Solution phase (conventional)**

A mixture of aldehyde **1a-e** (0.01 mol), ammonia (0.01 mol) and ethyl acetoacetate (0.02 mol) in 30 ml ethanol was refluxed for specified time. On completion of reaction as monitored by TLC examination, the reaction mixture was cooled for 20 hours, solid obtained was filtered, washed with cold methanol, dried and recrystallized from ethanol.

**Solid support (Microwave)**

To the solution of aldehyde **1a-e** (0.01 mol), ammonium acetate (0.01 mol) and ethyl acetoacetate (0.02 mol) in ethanol (15 ml) solid support (40 g) was added. The reaction mixture was dried in air, kept in an alumina bath and subjected to MWI for specified time (**Table 1**). On completion of reaction as examined by TLC (at an interval of 30 seconds) the product was extracted in ethanol (3 x 15 ml). On evaporation of solvent, the solid obtained was recrystallized from ethanol.

**Neat synthesis (Microwave)**

Aldehyde **1a-e** (0.01 mol), ammonium acetate (0.01 mol) and ethyl acetoacetate (0.02 mol) were taken in an Erlenmeyer flask and subjected to MWI. On completion of reaction as monitored by TLC at an interval of 30 seconds the sticky solid obtained was titurated with few drops of methanol to obtain the desired product **(3a-e)** which was recrystallized from ethanol.

*Spectroscopic data of all the synthesized compounds*

**Ethyl-6-methyl-2-thioxo-4-phenyl-1,2,3,4-tetrahydropyrimidine-5-carboxylate (2a) :** max/cm-1. 3340.24, 3111.86, 1670.42, 1264.05, 1027.15; H (60 MHz, DMSO-d6) 1.1 (t, 3H, CH3), 2.3 (s, 3H, CH3), 4.0 (q, 2H, OCH2), 5.2 (d, 1H, H-4), 7.2-7.4 (m, 5H, Ar), 9.6 (s, 1H, N-H), 10.3 (s, 1H, N-H).

**Ethyl-6-methyl-2-thioxo-4-furyl-1,2,3,4-tetrahydropyrimidine-5-carboxylate (2b) :** max/cm-1. 3318.36, 3119.71, 1708.77, 1276.57, 1086.11; H (60 MHz, DMSO-d6) 1.1 (t, 3H, CH3), 2.2 (s, 3H, CH3), 4.2 (q, 2H, OCH2), 5.2 (d, 1H, H-4), 6.1-6.3 (m, 2H, furan), 7.5 (s, 1H, furan), 7.8 (s, 1H, N-H), 9.2 (s, 1H, N-H).

**Ethyl-6-methyl-2-thioxo-4-indolyl-1,2,3,4-tetrahydropyrimidine-5-carboxylate (2c) :** max/cm-1. 3367.23, 3115.81, 1732.66, 1240.04, 1066.78; H (60 MHz, DMSO-d6), 1.1 (t, 3H, CH3), 2.1 (s, 3H, CH3), 4.1 (q, 2H, OCH2), 5.7 (d, 1H, H-4), 7.1-7.5 (m, 5H, indole), 8.4 (s, 1H, N-H), 10.12 (s, 1H, N-H indole).

**Ethyl-6-methyl-2-thioxo-4-piperonyl-1,2,3,4-tetrahydropyrimidine-5-carboxylate (2d) :** max/cm-1. 3315.73, 3118.97, 1746.35, 1236.68, 1073.17; H (60 MHz, CDCl3), 1.2 (t, 3H, CH3), 2.3 (s, 3H, CH3), 4.0 (q, 2H, OCH2), 5.3 (d, 1H, H-4), 5.9 (s, 2H, CH2 piperonal), 6.7-6.9 (m, 3H, piperonal), 7.2 (s, 1H, N-H), 7.5 (s, 1H, N-H).

**Ethyl-6-methyl-2-thioxo-4-[2'-chloro-7'-methyl-3'-quinolyl]-1,2,3,4-tetrahydro-pyrimidine-5-carboxylate (2e) :** max/cm-1. 3312.8, 3119.54, 1694.34, 1271.32, 1076.32; H (60 MHz, DMSO-d6), 1.1 (t, 3H, CH3), 2.3 (s, 3H, CH3-quinoline), 2.4 (s, 3H, CH3), 4.1 (q, 2H, OCH2), 5.4 (d, 1H, H-4), 7.2-8.1 (m, 4H, quinoline), 9.1 (s, 1H, N-H).

**Diethyl-4-phenyl-1,4-dihydro-2,6-dimethyl-3,5-pyridine-dicarboxylate (3a) :** max/cm-1. 3061.44, 1699.25, 1211.52, 1061.00; H (60 MHz, CDCl3), 1.3 (t, 6H, CH3), 2.5 (s, 6H, CH3), 4.1 (q, 4H, OCH2), 5.0 (s, 1H, H-4), 7.2-7.3 (m, 5H, Ar).

**Diethyl-4-furyl-1,4-dihydro-2,6-dimethyl-3,5-pyridine-dicarboxylate (3b) :** max/cm-1. 3346.54, 3094.88, 1701.78, 1208.07, 1052.36; H (60 MHz, CDCl3), 1.3 (t, 6H, CH3), 2.4 (s, 6H, CH3), 4.3 (q, 4H, OCH2), 5.3 (s, 1H, H-4), 6.8-7.0 (m, 3H, furan).

**Diethyl-4-indolyl-1,4-dihydro-2,6-dimethyl-3,5-pyridine-dicarboxylate (3c) :** max/cm-1. 3344.98, 3128.95, 1721.26, 1202.84, 1083.71; H (60 MHz, DMSO-d6), 1.2 (t, 6H, CH3), 2.4 (s, 6H, CH3), 4.2 (q, 4H, OCH2), 5.1 (s, 1H, H-4), 7.1-7.4 (m, 5H, indole).

**Diethyl-4-piperonyl-1,4-dihydro-2,6-dimethyl-3,5-pyridine-dicarboxylate (3d) :** max/cm-1. 3334.66, 3093.76, 1692.50, 1211.31, 1035.98; H (60 MHz, CDCl3), 1.1 (t, 6H, CH3), 2.3 (s, 6H, CH3), 4.1 (q, 4H, OCH2), 5.0 (s, 1H, H-4), 5.9 (s, 2H, –CH2), 6.7-7.0 (m, 3H, piperonal).

**Diethyl-4-(2'-chloro-7'-methyl-3'-quinolyl)-1,4-dihydro-2,6-dimethyl-3,5-pyridine- dicarboxylate (3e) :** max/cm-1. 3346.54, 3094.88, 1701.78, 1207.92, 1048.36; H (60 MHz, CDCl3), 1.2 (t, 3H, CH3), 2.3 (s, 3H, CH3, quinoline), 4.1 (q, 2H, CH2), 5.1 (s, 1H), 7.6-8.6 (m, 4H, quinoline).
